# Supplementary material for: Kimberlites and the start of plate tectonics: COMMENT
Source: Oxford University Press journal article supplement (doi:10.1130/g38681c.1), 2016-12-20
Supplement: e405.pdf [file e405.pdf]

## Kimberlites and the start of plate tectonics

**W.G. Ernst**

Department of Geological Sciences, Stanford University, Stanford, California 94305-2115, USA

Stern et al. (2016) have well documented the Neoproterozoic onset of modern-style plate tectonics on Earth, signaled by the first appearance of high-pressure, low-temperature (HP/LT) rocks such as oceanic blueschists (e.g., lawsonite- and jadeite-bearing rocks) ± LT eclogites, and ultrahigh-pressure (UHP) intracontinental sialic complexes + kimberlite diatremes. These phase assemblages are genetically associated with modern-style subduction zones—deep-seated realms of relatively cool, steeply descending lithospheric plates. However, Stern et al. then postulate that, reflecting formation of such high-density rocks and minerals, plate tectonics only began in the Neoproterozoic (<1.0 Ga). Other workers have suggested a substantially older onset of terrestrial plate tectonics involving at least shallow subduction, based on ancient production of ophiolite complexes, high-temperature eclogites, diamond pipes, and/or phase equilibria data coupled with thermal modeling (Ernst, 1972; Davies, 1992; Dilek and Polat, 2008; Shirey and Richardson, 2011; Shirey et al., 2013; Hastie et al., 2016).

If the process is defined by lithospheric underflow, then primitive plate tectonics evidently began in Hadean time soon after the magma ocean solidified (Condie, 1980, 1982; Sleep et al., 2014). Thin lithospheric slabs must have bounded the surface of the pre-Archean solid Earth, as required by the existence of zircons derived from granitic rocks as old as ca. 4.3 Ga (Compston and Pigeon, 1986; Condie, 2005; Harrison, 2009; Hopkins et al., 2008). Granites have low-pressure dry melting temperatures of ~950 °C, far below the ~1300 °C solidi of the refractory upper mantle (Ernst, 2007). Water oceans may even have partly covered the Hadean lithosphere (Wilde et al., 2001; Mojzsis et al., 2001; Watson and Harrison, 2005). At less than half their solidi, primordial rocky materials were present as thin plates in the near-surface Hadean Earth. Stagnant-lid convection (O'Neill and Debaille, 2014) may have occurred, but was at least episodically overwhelmed by shallow plate subduction, because heat transfer required vigorous mantle overturn in the early, hot planet.

Earth's heat escapes most effectively by convection (Davies, 1980; Sleep, 2000, 2007). Initial mantle circulation might have been chiefly bottom up (plume-driven), but as Earth cooled, top-down overturn (plate subduction) began to dominate its thermal evolution (Anderson, 2001; Anderson and Natland, 2014). Thus, early subduction of small, warm plates passed by degrees to the underflow of large, sinking lithospheric plates. Attending cooling (Korenaga, 2008; Herzberg et al., 2010), P-T conditions associated with the subducting plates must have evolved toward higher-P/lower-T values, accounting for the Neoproterozoic emergence of a modern-style subduction regime and the generation of HP/LT blueschist-eclogite rocks, diamond pipes, and UHP intracontinental sialic complexes (Stern et al., 2016; Ernst et al., 2016).

Concluding that terrestrial plate tectonics began in the Neoproterozoic arbitrarily defines mantle-driven convective processes as only the most recent stage of an evolutionary continuum transitioning from small-warm-shallow to large-cool-steep plate descent. Lithospheric subduction (plate tectonics) apparently has operated episodically or continuously (?) since consolidation of the Hadean magma ocean.

### REFERENCES CITED

- Anderson, D.L., 2001, Top-down tectonics: *Science*, v. 293, p. 2016–2018, doi:10.1126/science.1065448.
- Anderson, D.L., and Natland, J.H., 2014, Mantle updrafts and mechanisms of oceanic volcanism: *Proceedings of the National Academy of Sciences of the United States of America*, v. 111, p. E4298–E4304, doi:10.1073/pnas.1410229111.
- Condie, K.C., 1980, Origin and early development of the Earth's crust: *Precambrian Research*, v. 11, p. 183–197, doi:10.1016/0301-9268(80)90064-9.
- Condie, K.C., 1982, *Plate Tectonics and Crustal Evolution*: New York, Pergamon Press, 310 p.
- Condie, K.C., 2005, *Earth as an Evolving Planetary System*: Amsterdam, Academic Press, 447 p.
- Compston, W., and Pigeon, R.T., 1986, Jack Hills, evidence of more very old detrital zircons in western Australia: *Nature*, v. 321, p. 766–769, doi:10.1038/321766a0.
- Davies, G.F., 1980, Thermal histories of convective Earth models and constraints on radiogenic heat production in the Earth: *Journal of Geophysical Research*, v. 85: 2517–2530.
- Davies, G.F., 1992, On the emergence of plate tectonics: *Geology*, v. 20, p. 963–966.
- Dilek, Y., and Polat, A., 2008, Suprasubduction zone ophiolites and Archean tectonics: *Geology*, v. 36, p. 431–432, doi:10.1130/Focus052008.1.
- Ernst, W.G., 1972, Occurrence and mineralogic evolution of blueschist belts with time: *American Journal of Science*, v. 272, p. 657–668, doi:10.2475/ajs.272.7.657.
- Ernst, W.G., 2007, Speculations on evolution of the terrestrial lithosphere-asthenosphere system—Plumes and plates: *Gondwana Research*, v. 11, p. 38–49, doi:10.1016/j.gr.2006.02.007.
- Ernst, W.G., Sleep, N.H., and Tsujimori, T., 2016, 2016, Plate-tectonic evolution of the Earth: Bottom-up and top-down mantle circulation: *Canadian Journal of Earth Sciences*, v. 53, p. 1–18, doi:10.1139/cjes-2015-0126.
- Harrison, T.M., 2009, The Hadean crust: Evidence from >4 Ga zircons: *Annual Review of Earth and Planetary Sciences*, v. 37, p. 479–505, doi:10.1146/annurev.earth.031208.100151.
- Hastie, A.R., Fitton, G., Bromiley, G.D., Butler, I.B., and Odling, W.A., 2016, The origin of Earth's first continents and the onset of plate Tectonics: *Geology*, v. 44, p. 855–858, doi:10.1130/G38226.1.
- Herzberg, C., Condie, K., and Korenaga, J., 2010, Thermal history of the Earth and its petrological expression: *Earth and Planetary Science Letters*, v. 292, p. 79–88, doi:10.1016/j.epsl.2010.01.022.
- Hopkins, M., Harrison, T.M., and Manning, C.E., 2008, Low heat flow inferred from >4 Gyr zircons suggests Hadean plate boundary interactions: *Nature*, v. 456, p. 493–496, doi:10.1038/nature07465.
- Korenaga, J., 2008, Urey ratio and the structure and evolution of Earth's mantle: *Reviews of Geophysics*, v. 46, RG2007, doi:10.1029/2007RG000241.
- Mojzsis, S.J., Harrison, T.M., and Pidgeon, R.T., 2001, Oxygen-isotope evidence from ancient zircons for liquid water at the Earth's surface 4,300 Myr ago: *Nature*, v. 409, p. 178–181, doi:10.1038/35051557.
- O'Neill, C.O., and Debaille, V., 2014, The evolution of Hadean-Eoarchean geodynamics: *Earth and Planetary Science Letters*, v. 406, p. 49–58, doi:10.1016/j.epsl.2014.08.034.
- Shirey, S.B., and Richardson, S.H., 2011, Start of the Wilson cycle at 3Ga shown by diamonds from subcontinental mantle: *Science*, v. 333, p. 434–436.
- Shirey, S.B., Cartigny, P., Frost, D.J., Keshav, S., Nestola, F., Nimis, P., Pearson, D.G., Sobolev, N.V., and Walter, M.J., 2013, Diamonds and the geology of mantle carbon: *Reviews in Mineralogy and Geochemistry*, v. 75, p. 355–421.
- Sleep, N.H., 2000, Evolution of the mode of convection within terrestrial planets: *Journal of Geophysical Research*, v. 105, p. 17,563–17,578, doi:10.1029/2000JE001240.
- Sleep, N.H., 2007, Plate tectonics through time: *Treatise on Geophysics*, v. 9, p. 145–169, doi:10.1016/B978-044452748-6/00143-7.
- Sleep, N.H., Zahnle, K.J., and Lupur, R.E., 2014, Terrestrial aftermath of the Moon-forming impact: *Philosophical Transactions of the Royal Society*, v. A372, doi:10.1098/rsta.2013.0172.
- Stern, R.J., Leybourne, M.I., and Tsujimori, T., 2016, Kimberlites and the start of plate tectonics: *Geology*, v. 44, p. 799–802, doi:10.1130/G38024.1.
- Watson, E.B., and Harrison, T.M., 2005, Zircon thermometer reveals minimum melting conditions on earliest: *Earth Science*, v. 308, p. 841–844.
- Wilde, S.A., Valley, J.W., Peck, W.H., and Graham, C.M., 2001, Evidence from detrital zircons for the existence of continental crust and oceans on the Earth 4.4 Ga ago: *Nature*, v. 409, p. 175–178, doi:10.1038/35051550.
